# Supplementary material for: Optimizing health facility location for universal health care: A case study from the Philippines
Source: PLOS journal article supplement (doi:10.1371/journal.pone.0256821), 2021-09-09
Supplement: S2 (10.1371/journal.pone.0256821.s002) [file journal.pone.0256821.s002]

## **S2 Appendix. Algorithm 2: Computing Number of Visitors without Double Counting for a Single Configuration\***

### **\*Note:**

A configuration defines which subset of IDs from the set of all candidate sites should be optimized (e.g. selecting 2 RHU sites for upgrading).

### **Input:**

- (1) *site\_list*: List of site IDs based on the defined configuration,
- (2) *pop*: List of population values at each population point for the entire city,
- (3) *exp\_visitors*: Matrix of expected visitors (of size:  $n\_population\_points \times n\_facilities$ , eq 2). We use this as a reference

### **Algorithm:**

1.  $total\_visitors\_count \leftarrow 0$
2. For *site\_id* in *site\_list*:
  - a.  $actual\_demand \leftarrow$  List of the number of visitors from each population point that may travel to the site (*site\_id*) to the site corresponding to *site\_id*, Calculated as the minimum value between the remaining population (*pop*) and the expected number of visitors from the population point (*exp\_visitors* at *site\_id*)
  - b.  $pop \leftarrow$  Reduce the remaining population at each population point (*pop*) by the  $actual\_demand$  at *site\_id*
  - c.  $total\_visitors\_count \leftarrow$  Increment the number of visitors for this configuration ( $total\_visitors\_count$ ) by the number of visitors contributed by *site\_id* ( $sum(actual\_demand)$ )

**Output:** Total expected visitors  $total\_visitors\_count$  for the defined configuration
